# Supplementary material
Source: PubMed Central journal article supplement (PMC9619446)
Supplement: ciac769_supplementary_data.pdf [file ciac769_supplementary_data.pdf]

## Supplementary Appendix.

### Detailed Methods.

**Sample collection.** Nasopharyngeal swabs were sampled from individuals suspected to have an infection with SARS-CoV-2 as part of clinical diagnostics or hospital admittance. Samples were collected in 3 mL viral transport medium (VTM; Copan universal transport medium or equivalent). Clinical testing was performed using the Cepheid Xpert SARS-CoV-2/Flu/RSV assays, for all samples described in this report, except for the initial positive test for Case 2, which was done on a Biofire instrument, that yields no Ct information.

**RNA extraction, library preparation, sequencing and bioinformatic analysis.** RNA was extracted from 400  $\mu$ l of each nasopharyngeal swab specimen using the MagMAX™ Viral/Pathogen Nucleic Acid Isolation Kit on the KingFisher flex system (Thermo Fisher Scientific) following the manufacturer's instructions. Total RNA (11  $\mu$ l) was converted to first strand cDNA by random priming using the Superscript IV first-strand synthesis system (Invitrogen, ref# 180901050). Libraries were prepared using the XGen SARS-CoV-2 amplicon-based library prep method (IDT, Coralville, Iowa), following the manufacturer's instructions. Sequencing was performed on an Illumina NovaSeq 6000, 150PE, dual index run. Sequencing reads were demultiplexed using the Illumina bcl2fastq2 Conversion Software v2.20 and adapters and low-quality bases were trimmed with Trimmomatic v0.36. BWA v0.7.17 was utilized for mapping reads to the SARS-CoV-2 reference genome (NC\_045512.2, wuhCor1). Panel-specific tiled primer sequences were removed using Primerclip v.0.3.8. BCFtools v1.9 was used to call mutations and assemble consensus sequences. Phylogenetic lineage was assigned using Pango nomenclature<sup>1,2</sup> (v.4.0.6 PLEARN-v1.8). Nextclade v2.0.0 and Auspice v2.37.3 (phylogenomic visualization Nextstrain project) were used to examine viral genome clade assignment and mutation calling. Sequences that did not yield a near-complete viral genome (<23,000bp, <4000x coverage) were discarded from further analysis.

**Structural analysis.** The structure of the polymerase complex dimer is based on pdb 7egq with remdesivir added by structural overlay of a remdesivir-bound nsp12 complex (pdb 7l1f)<sup>3,4</sup>

### References.

1. Rambaut A, Holmes EC, O'Toole A, et al. A dynamic nomenclature proposal for SARS-CoV-2 lineages to assist genomic epidemiology. *Nat Microbiol* 2020;5:1403-7.
2. Hadfield J, Megill C, Bell SM, et al. Nextstrain: real-time tracking of pathogen evolution. *Bioinformatics* 2018;34:4121-3.
3. Yan L, Yang Y, Li M, et al. Coupling of N7-methyltransferase and 3'-5' exoribonuclease with SARS-CoV-2 polymerase reveals mechanisms for capping and proofreading. *Cell* 2021;184:3474-85 e11.
4. Bravo JPK, Dangerfield TL, Taylor DW, Johnson KA. Remdesivir is a delayed translocation inhibitor of SARS-CoV-2 replication. *Mol Cell* 2021;81:1548-52 e4.

Supplemental Table 1. Complete list of all non-synonymous mutations in the longitudinal SARS-CoV-2 samples from Case 1 and Case 2

| Case 1                     | Case 1                     |                            |                            |                            |                            |                            |                                                         | Case 2                                    |                                           |                                           |
|----------------------------|----------------------------|----------------------------|----------------------------|----------------------------|----------------------------|----------------------------|---------------------------------------------------------|-------------------------------------------|-------------------------------------------|-------------------------------------------|
|                            | d0<br>EPI_ISL_8715853      | d24<br>EPI_ISL_9440988     | d32<br>EPI_ISL_10650972    | d38<br>EPI_ISL_10651032    | d58<br>EPI_ISL_11624936    | d109<br>EPI_ISL_12511256   | d116<br>EPI_ISL_12972268                                | d18<br>EPI_ISL_9440904                    | d25<br>EPI_ISL_9710398                    | d32<br>EPI_ISL_10650964                   |
| NSP3:K38R                  | NSP3:K38R<br><b>NSP3:G301S</b><br><b>NSP3:S702P</b>     | NSP3:K38R                                 | NSP3:K38R                                 | NSP2:V485I<br>NSP3:K38R                   |
| NSP3:SL1265-1266i deletion                              | NSP3:V1069I<br>NSP3:SL1265-1266i deletion | NSP3:V1069I<br>NSP3:SL1265-1266i deletion | NSP3:V1069I<br>NSP3:SL1265-1266i deletion |
| NSP3:A1892T                                             | NSP3:A1892T                               | NSP3:A1892T                               | NSP3:A1892T                               |
| NSP4:T492I                                              | NSP4:T492I                                | NSP4:T492I                                | NSP4:T492I                                |
| NSP5:P132H                                              | NSP5:P132H                                | NSP5:P132H                                | NSP5:P132H                                |
| NSP6:LSG105-107 deletion                                | NSP6:LSG105-107 deletion                  | NSP6:LSG105-107 deletion                  | NSP6:LSG105-107 deletion                  |
| NSP6:I189V                 | NSP6:I189V<br>NSP6:I210V                                | NSP6:I189V<br>NSP6:I210V                  | NSP6:I189V<br>NSP6:I210V                  | NSP6:I189V<br>NSP6:I210V                  |
| NSP12:P323L                | NSP12:P323L<br><b>NSP12:V792I</b><br><b>NSP12:V792I</b> | NSP12:P323L<br>NSP12:V792I                | NSP12:P323L<br>NSP12:V792I                | NSP12:P323L<br>NSP12:V792I                |
| NSP14:I42V<br>S:A67V                                    | NSP14:I42V<br>NSP14:V381I                 | NSP14:I42V<br>NSP14:V381I                 | NSP14:I42V<br>NSP14:V381I                 |
| S:HV69-70 deletion                                      | S:HV69-70 deletion                        | S:HV69-70 deletion                        | S:HV69-70 deletion                        |
| S:T95I                                                  | S:T95I                                    | S:T95I                                    | S:T95I                                    |
| S:GVYY142-145D deletion                                 | S:GVYY142-145D deletion                   | S:GVYY142-145D deletion                   | S:GVYY142-145D deletion                   |
| S:G339D                                                 | S:G339D*                                  | S:G339D                                   | S:G339D                                   |
| S:R346K                                                 | S:R346K                                   | S:R346K                                   | S:R346K                                   |
| S:S371L                                                 | S:S371L                                   | S:S371L                                   | S:S371L                                   |
| S:S373P                                                 | S:S373P                                   | S:S373P                                   | S:S373P                                   |
| S:S375F                                                 | S:S375F                                   | S:S375F                                   | S:S375F                                   |
| S:K417N*                   | S:K417N                    | S:K417N*                   | S:K417N*                   | S:K417N*                   | S:K417N*                   | S:K417N*                   | S:K417N*                                                | S:K417N*                                  | S:K417N*                                  | S:K417N*                                  |
| S:N440K                                                 | S:N440K                                   | S:N440K                                   | S:N440K                                   |
| S:G446S                                                 | S:G446S                                   | S:G446S                                   | S:G446S                                   |
| S:S477N                                                 | S:S477N                                   | S:S477N                                   | S:S477N                                   |
| S:T478K                                                 | S:T478K                                   | S:T478K                                   | S:T478K                                   |
| S:E484A                                                 | S:E484A                                   | S:E484A                                   | S:E484A                                   |
| S:Q493R                                                 | S:Q493R                                   | S:Q493R                                   | S:Q493R                                   |
| S:G496S                                                 | S:G496S                                   | S:G496S                                   | S:G496S                                   |
| S:Q498R                                                 | S:Q498R                                   | S:Q498R                                   | S:Q498R                                   |
| S:N501Y                                                 | S:N501Y                                   | S:N501Y                                   | S:N501Y                                   |
| S:Y505H                                                 | S:Y505H                                   | S:Y505H                                   | S:Y505H                                   |
| S:T547K                                                 | S:T547K                                   | S:T547K                                   | S:T547K                                   |
| S:D614G                                                 | S:D614G                                   | S:D614G                                   | S:D614G                                   |
| S:H655Y                                                 | S:H655Y                                   | S:H655Y                                   | S:H655Y                                   |
| S:N679K                                                 | S:N679K                                   | S:N679K                                   | S:N679K                                   |
| S:P681H                                                 | S:P681H                                   | S:P681H                                   | S:P681H                                   |
| S:N764K                                                 | S:N764K*                                  | S:N764K                                   | S:N764K                                   |
| S:D796Y                                                 | S:D796Y*                                  | S:D796Y                                   | S:D796Y                                   |
| S:N856K                                                 | S:N856K                                   | S:N856K                                   | S:N856K                                   |
| S:Q954H                                                 | S:Q954H                                   | S:Q954H                                   | S:Q954H                                   |
| S:N969K                                                 | S:N969K                                   | S:N969K                                   | S:N969K                                   |
| S:L981F                                                 | S:L981F                                   | S:L981F                                   | S:L981F                                   |
| S:K1266R                                                | S:K1266R                                  | S:K1266R                                  | S:K1266R                                  |
| E:T9I                                                   | E:T9I                                     | E:T9I                                     | E:T9I                                     |
| M:D3G                                                   | M:D3G                                     | M:D3G                                     | M:D3G                                     |
| M:Q19E                                                  | M:Q19E*                                   | M:Q19E                                    | M:Q19E                                    |
| M:A63T                                                  | M:A63T                                    | M:A63T                                    | M:A63T                                    |
| N:P13L                                                  | N:P13L                                    | N:P13L                                    | N:P13L                                    |
| N:ERS31-33 deletion                                     | N:ERS31-33 deletion                       | N:ERS31-33 deletion                       | N:ERS31-33 deletion                       |
| N:R203K                                                 | N:R203K                                   | N:R203K                                   | N:R203K                                   |
| N:G204R                                                 | N:G204R                                   | N:G204R                                   | N:G204R                                   |

Footnotes:

\*coverage below 100%

Timepoints refer to RT-PCR positive tests, with d0 (Day 0) being the first positive test for the patient

EPI\_ISL\_numbers are the GISAID numbers for our deposited sequences

Longitudinally newly acquired mutations are in bold
